# Supplementary material for: How Do Shifts in Patients with Mental Health Problems’ Formal and Informal Care Utilization Affect Informal Caregivers?: A COVID-19 Case Study
Source: MDPI journal article supplement (doi:10.3390/ijerph192416425), 2022-12-07
Supplement: s1 [file s1]

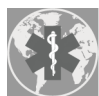

Supplementary Materials

# How Do Shifts in Patients with Mental Health Problems' Formal and Informal Care Utilization Affect Informal Caregivers?: A COVID-19 Case Study

## Supplementary File: Detailed Results of Mediation Analyses

Dependent Variable: Change in Subjective Burden

**Table S1.** Model Coefficients for Mediation Analysis- Change in Subjective Burden.

|                                         |       | Total Effect                    |       | M ( $\Delta$ Informal Care Utilization) |       | Y ( $\Delta$ Subjective Burden) |        |
|-----------------------------------------|-------|---------------------------------|-------|-----------------------------------------|-------|---------------------------------|--------|
|                                         |       | Y ( $\Delta$ Subjective Burden) |       |                                         |       |                                 |        |
|                                         |       | Coeff.                          | SE    | Coeff.                                  | SE    | Coeff.                          | SE     |
| <i>Antecedent</i>                       |       |                                 |       |                                         |       |                                 |        |
| X ( $\Delta$ Formal care utilization)   | X1    | 0.423                           | 0.322 | -1.953*                                 | 0.887 | 0.367                           | 0.326  |
|                                         | X2    | 0.119                           | 0.290 | 0.027                                   | 0.798 | 0.120                           | 0.290  |
| M ( $\Delta$ Informal care utilization) |       | -                               | -     | -                                       | -     | -0.028                          | 0.025  |
| <i>Covariates</i>                       |       |                                 |       |                                         |       |                                 |        |
| Overall COVID-19 related concerns       |       |                                 |       |                                         |       |                                 |        |
|                                         |       | 0.137                           | 0.189 | -0.418                                  | 0.521 | 0.125                           | 0.190  |
| Age                                     |       |                                 |       |                                         |       |                                 |        |
|                                         |       | 0.014                           | 0.008 | -0.031                                  | 0.022 | 0.013                           | 0.008  |
| Care recipient comorbidity status       |       |                                 |       |                                         |       |                                 |        |
|                                         |       | 0.078                           | 0.254 | 1.254                                   | 0.698 | 0.113                           | 0.255  |
| Child caregiving responsibility         |       |                                 |       |                                         |       |                                 |        |
|                                         |       | 0.232                           | 0.277 | -0.892                                  | 0.763 | 0.207                           | 0.278  |
| Gender                                  |       |                                 |       |                                         |       |                                 |        |
|                                         |       | 0.687**                         | 0.234 | -0.611                                  | 0.644 | 0.670**                         | 0.234  |
| Employment status                       |       |                                 |       |                                         |       |                                 |        |
|                                         |       | 0.107                           | 0.259 | -0.714                                  | 0.713 | 0.087                           | 0.259  |
| Care recipient living situation         |       |                                 |       |                                         |       |                                 |        |
|                                         |       | -0.207                          | 0.268 | 0.613                                   | 0.738 | -0.189                          | 0.268  |
| Constant                                | $i_1$ | -1.160                          | 0.634 | $i_2$                                   | 1.792 | $i_3$                           | -1.109 |
|                                         |       | $R^2 = 0.0675$                  |       | $R^2 = 0.064$                           |       | $R^2 = 0.073$                   |        |
|                                         |       | $F(9, 204) = 1.641, p = 0.1056$ |       | $F(9, 204) = 1.537, p = 0.137$          |       | $F(10, 203) = 1.604, p = 0.108$ |        |

Notes. \*  $p < 0.05$ ; \*\*  $p < 0.01$ ; \*\*\*  $p < 0.001$ ; coeff. coefficient; F F value; SE standard error.

Dependent Variable: Change in Happiness

**Table S2.** Model Coefficients for Mediation Analysis- Change in Happiness.

|                                   |    | Total Effect               |        | M (Δ Informal Care Utilization) |         | Y (Δ Happiness)             |        |        |       |
|-----------------------------------|----|----------------------------|--------|---------------------------------|---------|-----------------------------|--------|--------|-------|
|                                   |    | Y (Δ Happiness)            |        |                                 |         |                             |        |        |       |
|                                   |    | Coeff.                     | SE     | Coeff.                          | SE      | Coeff.                      | SE     |        |       |
| Antecedent                        |    |                            |        |                                 |         |                             |        |        |       |
| X (Δ Formal care utilization)     | c  | X1                         | -0.227 | 0.286                           | -1.953* | 0.887                       | -0.292 | 0.288  |       |
|                                   |    | X2                         | -0.294 | 0.257                           | 0.027   | 0.798                       | -0.293 | 0.256  |       |
| M (Δ Informal care utilization)   |    | -                          | -      | -                               | -       | b                           | -0.033 | 0.023  |       |
| Covariates                        |    |                            |        |                                 |         |                             |        |        |       |
| Overall COVID-19 related concerns |    | -0.449**                   | 0.168  | -0.418                          | 0.521   | -0.463**                    | 0.168  |        |       |
| Age                               |    | 0.008                      | 0.007  | -0.032                          | 0.022   | 0.007                       | 0.007  |        |       |
| Care recipient comorbidity status |    | -0.121                     | 0.225  | 1.254                           | 0.698   | -0.079                      | 0.226  |        |       |
| Child caregiving responsibility   |    | 0.626*                     | 0.246  | -0.892                          | 0.763   | 0.600*                      | 0.246  |        |       |
| Gender                            |    | -0.0840                    | 0.208  | -0.611                          | 0.644   | -0.104                      | 0.207  |        |       |
| Employment status                 |    | -0.137                     | 0.230  | -0.714                          | 0.713   | -0.161                      | 0.230  |        |       |
| Care recipient living situation   |    | -0.321                     | 0.238  | 0.613                           | 0.738   | -0.300                      | 0.237  |        |       |
| Constant                          | i1 | -0.100                     | 0.562  | i2                              | 1.792   | 1.744                       | i3     | -0.040 | 0.562 |
|                                   |    | R²= 0.093                  |        | R²= 0.064                       |         | R²= 0.103                   |        |        |       |
|                                   |    | F(9, 204)= 2.324, p= 0.017 |        | F(9, 204)= 1.537, p= 0.137      |         | F(10, 203)= 2.323, p= 0.013 |        |        |       |

Notes. \*  $p < 0.05$ ; \*\*  $p < 0.01$ ; \*\*\*  $p < 0.001$ ; coeff. coefficient; F F value; SE standard error.

## Dependent Variable: Change in Psychological Wellbeing

Table S3. Model Coefficients for Mediation Analysis- Change in Psychological Wellbeing.

|                                         |                      | Total Effect                          |       | M ( $\Delta$ Informal Care Utilization) |         | Y ( $\Delta$ Psychological Wellbeing) |         |
|-----------------------------------------|----------------------|---------------------------------------|-------|-----------------------------------------|---------|---------------------------------------|---------|
|                                         |                      | Y ( $\Delta$ Psychological Wellbeing) |       |                                         |         |                                       |         |
|                                         |                      | Coeff.                                | SE    | Coeff.                                  | SE      | Coeff.                                | SE      |
| <i>Antecedent</i>                       |                      |                                       |       |                                         |         |                                       |         |
| X ( $\Delta$ Formal care utilization)   | X1                   | -0.007                                | 0.244 | <i>a</i>                                | -1.953* | <i>c'</i>                             | 0.019   |
|                                         | X2                   | -0.151                                | 0.220 |                                         | 0.027   |                                       | 0.220   |
| M ( $\Delta$ Informal care utilization) |                      | -                                     | -     | -                                       | -       | <i>b</i>                              | 0.013   |
| <i>Covariates</i>                       |                      |                                       |       |                                         |         |                                       |         |
| Overall COVID-19 related concerns       |                      | -0.172                                | 0.144 |                                         | -0.418  |                                       | -0.166  |
| Age                                     |                      | -0.009                                | 0.006 |                                         | -0.031  |                                       | -0.008  |
| Care recipient comorbidity status       |                      | -0.197                                | 0.192 |                                         | 1.254   |                                       | -0.213  |
| Child caregiving responsibility         |                      | 0.100                                 | 0.210 |                                         | -0.892  |                                       | 0.112   |
| Gender                                  |                      | -0.400*                               | 0.177 |                                         | -0.611  |                                       | -0.391* |
| Employment status                       |                      | -0.157                                | 0.196 |                                         | -0.714  |                                       | -0.148  |
| Care recipient living situation         |                      | -0.409*                               | 0.203 |                                         | 0.613   |                                       | -0.148* |
| Constant                                | <i>i<sub>1</sub></i> | 1.146*                                | 0.480 | <i>i<sub>2</sub></i>                    | 1.792   | <i>i<sub>3</sub></i>                  | 1.123*  |
|                                         |                      | R <sup>2</sup> = 0.064                |       | R <sup>2</sup> = 0.064                  |         | R <sup>2</sup> = 0.067                |         |
|                                         |                      | F(9, 204) = 1.558, p = 0.130          |       | F(9, 204) = 1.537, p = 0.137            |         | F(10, 203) = 1.445, p = 0.163         |         |

Notes. \*  $p < 0.05$ ; \*\*  $p < 0.01$ ; \*\*\*  $p < 0.001$ ; coeff. coefficient; F F value; SE standard error.
